# Supplementary material for: CmLOX10 positively regulates drought tolerance through jasmonic acid -mediated stomatal closure in oriental melon (Cucumis melo var. makuwa Makino)
Source: PubMed Central journal article supplement (PMC7562952; doi:10.1038/s41598-020-74550-7), 2020-10-15
Supplement: 41598_2020_74550_MOESM1_ESM.pdf [file 41598_2020_74550_MOESM1_ESM.pdf]

**Supplementary material**

***CmLOX10* positively regulates drought tolerance through jasmonic acid -mediated stomatal closure in oriental melon (*Cucumis melo* var. *akuwa* Makino)**

**Authors:** Qiaojuan Xing<sup>1</sup>, Jingjing Liao<sup>1</sup>, Songxiao Cao<sup>1</sup>, Meng Li<sup>1</sup>, Tinghui Lv<sup>1</sup>, and Hongyan Qi<sup>1\*</sup>

**Supplementary Table S1. Primer sequences used for qRT-PCR.**

| Primers                                   | Sequence (5'-3')         |
|-------------------------------------------|--------------------------|
| <b>Primers used in <i>Arabidopsis</i></b> |                          |
| <i>AtAOS-F</i>                            | TGGCTTCTATTTCAACCCCTTTTC |
| <i>AtAOS-R</i>                            | AGATCCGGTTTCGAGATGACTTG  |
| <i>AtAOC3-F</i>                           | AACTGAGCGTGTACGAAATCAAT  |
| <i>AtAOC3-R</i>                           | CAAACATACTGCATTCACAAGGA  |
| <i>OPR3-F</i>                             | TGGACGCAACTGATTCTGAC     |
| <i>OPR3-R</i>                             | GCGAGCTTTGAGCCATTAAC     |
| <i>Actin7-F</i>                           | GGAAGTGAATGGTGAAGGCTG    |
| <i>Actin7-R</i>                           | CGATTGGATACTTCAGAGTGAGGA |
| <i>CmLOX10-F</i>                          | GTCACGGCGGTTTTGAACATA    |
| <i>CmLOX10-R</i>                          | GATTCGGTCAGCATTCCTTTC    |
| <b>Primers used in oriental melon</b>     |                          |
| <i>18S-RNA-F</i>                          | GTGATGGTGTGAGTCACACTGTTC |
| <i>18S-RNA-R</i>                          | ACGACCAGCAAGGTCCAAC      |
| <i>CmLOX01-F</i>                          | CCATCAACTTATCAGCCATT     |
| <i>CmLOX01-R</i>                          | GTTCGTTCAAGAAGACCAT      |
| <i>CmLOX02-F</i>                          | TAGCACCGAAGGAATCAC       |
| <i>CmLOX02-R</i>                          | AGACAGCACAATAACAGAGT     |
| <i>CmLOX03-F</i>                          | GACGACGAGAATGGAGAG       |
| <i>CmLOX03-R</i>                          | GCTGGTTGAACTGTTGATAC     |
| <i>CmLOX04-F</i>                          | GGCTAACTTCAATCCCACCA     |
| <i>CmLOX04-R</i>                          | GCTCAGTGAAGTTATCAAGA     |
| <i>CmLOX05-F</i>                          | GCTGCTTGTCTCCTCATT       |
| <i>CmLOX05-R</i>                          | AGTCTTCAACTGCCATTC       |
| <i>CmLOX06-F</i>                          | GTGTATGTTCCAAGAGATG      |
| <i>CmLOX06-R</i>                          | TGAATAAGTTGAGGAGTA       |
| <i>CmLOX07-F</i>                          | TACTTGGAGGAATGGATA       |
| <i>CmLOX07-R</i>                          | TTGTTGTAACGGTGAGAC       |
| <i>CmLOX08-F</i>                          | GGTAACTGGTCGTGGAAT       |
| <i>CmLOX08-R</i>                          | AAGGCAGAGGAATAACAGAA     |
| <i>CmLOX09-F</i>                          | CAGATCCATCTTGTGAAC       |
| <i>CmLOX09-R</i>                          | AGTTGGTAGAGTCATTCC       |
| <i>CmLOX10-F</i>                          | TGACAGGACAAGGAGTTC       |
| <i>CmLOX10-R</i>                          | CGGTATTGGCAAGAATGTTA     |
| <i>CmLOX11-F</i>                          | CAAGTCATCTCCAGATG        |
| <i>CmLOX11-R</i>                          | GTTGATAAGGTCCAATCC       |
| <i>CmLOX12-F</i>                          | GTAAAGTTCTTCAGCATAACG    |
| <i>CmLOX12-R</i>                          | ACGAGGATGGATAGTAATG      |
| <i>CmLOX13-F</i>                          | CAAGCAACACAGGTAATG       |
| <i>CmLOX13-R</i>                          | CTCCAGTTCTATTCTTCAAG     |

---

|                  |                        |
|------------------|------------------------|
| <i>CmLOX14-F</i> | CAAGTGAACCAGATAACAAG   |
| <i>CmLOX14-R</i> | CAGAGGAATTGGAATGAAG    |
| <i>CmLOX15-F</i> | CTATTATGCTGATGCTGAG    |
| <i>CmLOX15-R</i> | GAAGGAAGTTGACAGATG     |
| <i>CmLOX16-F</i> | ATACGGACCTCAAGAATC     |
| <i>CmLOX16-R</i> | GAGTCAAAGTGCATCAG      |
| <i>CmLOX17-F</i> | TGACTATCTAATGCCACTTC   |
| <i>CmLOX17-R</i> | CCAACTTATCTCTTCTCCT    |
| <i>CmLOX18-F</i> | TGGAGACTATCACAATCG     |
| <i>CmLOX18-R</i> | CTTTCCCATCACCTCTAA     |
| <i>SLAC1-F</i>   | TTTCCCCGTTCAACCT       |
| <i>SLAC1-R</i>   | GCCTCCAACCACCCACAT     |
| <i>SLAH3-F</i>   | CCCTGGATAGCCCTCTTGTT   |
| <i>SLAH3-R</i>   | TCTCATTGGTTGGTAGTCTGAT |

---

**Supplementary Table. S2** Expression of plant hormone JA and ABA biosynthesis gene transcripts  
(RNA-seq analyses).

|              | Gene<br>Symbol | CK-10  |        | CK-WT  |        | D-10   |        | D-WT   |        | Log <sub>2</sub> FC |               |                |                |       |       |       |       |
|--------------|----------------|--------|--------|--------|--------|--------|--------|--------|--------|---------------------|---------------|----------------|----------------|-------|-------|-------|-------|
|              |                |        |        |        |        |        |        |        |        | CK-10<br>/CK-WT     | D-10/<br>D-WT | D-10/<br>CK-10 | D-WT<br>/CK-WT |       |       |       |       |
| JA           | <i>CYP74A</i>  | 227.14 | 831.13 | 224.96 | 609.06 | 448.47 | 388.96 | 118.34 | 266.35 | 251.53              | 153.20        | 247.71         | 205.76         | -0.17 | 0.07  | -1.01 | -1.25 |
| biosynthesis | <i>AOC1</i>    | 116.17 | 438.18 | 169.34 | 211.62 | 115.23 | 141.75 | 57.03  | 209.37 | 124.33              | 122.61        | 176.14         | 120.90         | 0.63  | -0.10 | -0.89 | -0.16 |
|              | <i>AOC2</i>    | 113.09 | 417.27 | 176.53 | 216.77 | 154.06 | 174.19 | 69.82  | 191.83 | 114.61              | 102.77        | 184.51         | 136.32         | 0.38  | -0.17 | -0.91 | -0.36 |
|              | <i>AOC3</i>    | 27.92  | 96.31  | 16.19  | 24.63  | 50.42  | 68.67  | 7.90   | 9.74   | 23.48               | 7.51          | 5.35           | 6.55           | -0.03 | 1.08  | -1.77 | -2.89 |
|              | <i>AOC4</i>    | 42.21  | 30.69  | 19.47  | 46.94  | 53.43  | 42.94  | 49.96  | 26.33  | 26.59               | 34.73         | 24.31          | 34.92          | -0.63 | 0.13  | 0.16  | -0.61 |
|              | <i>OPR3</i>    | 141.14 | 678.90 | 92.14  | 217.14 | 168.87 | 238.16 | 53.24  | 74.77  | 142.77              | 36.65         | 34.92          | 44.65          | 0.55  | 1.22  | -1.75 | -2.43 |
| ABA          | <i>ZEP</i>     | 468.63 | 580.51 | 641.12 | 524.18 | 456.60 | 497.33 | 397.22 | 557.86 | 478.78              | 536.44        | 809.83         | 520.77         | 0.19  | -0.38 | -0.24 | 0.34  |
| biosynthesis | <i>ABA2</i>    | 24.02  | 14.12  | 19.41  | 28.08  | 23.50  | 20.26  | 22.68  | 12.75  | 12.19               | 18.74         | 15.34          | 19.23          | -0.32 | -0.16 | -0.27 | -0.43 |
|              | <i>ABA4</i>    | 14.15  | 13.70  | 19.92  | 25.50  | 18.65  | 17.17  | 16.39  | 16.90  | 14.92               | 16.97         | 25.80          | 25.32          | -0.36 | -0.50 | 0.01  | 0.15  |
|              | <i>AAO3</i>    | 6.75   | 8.38   | 7.68   | 5.13   | 5.90   | 8.56   | 8.58   | 8.46   | 11.31               | 13.88         | 8.68           | 6.08           | 0.22  | -0.02 | 0.31  | 0.55  |
|              | <i>NCED3</i>   | 4.09   | 5.52   | 6.75   | 7.74   | 10.59  | 16.95  | 8.40   | 8.45   | 15.17               | 17.38         | 12.40          | 6.91           | -1.11 | -0.20 | 0.97  | 0.06  |
|              | <i>NCED5</i>   | 0.06   | 0.11   | 0.20   | 0.08   | 0.12   | 0.09   | 0.08   | 0.08   | 0.00                | 0.11          | 0.19           | 0.04           | 0.04  | 0.37  | -0.49 | -0.97 |

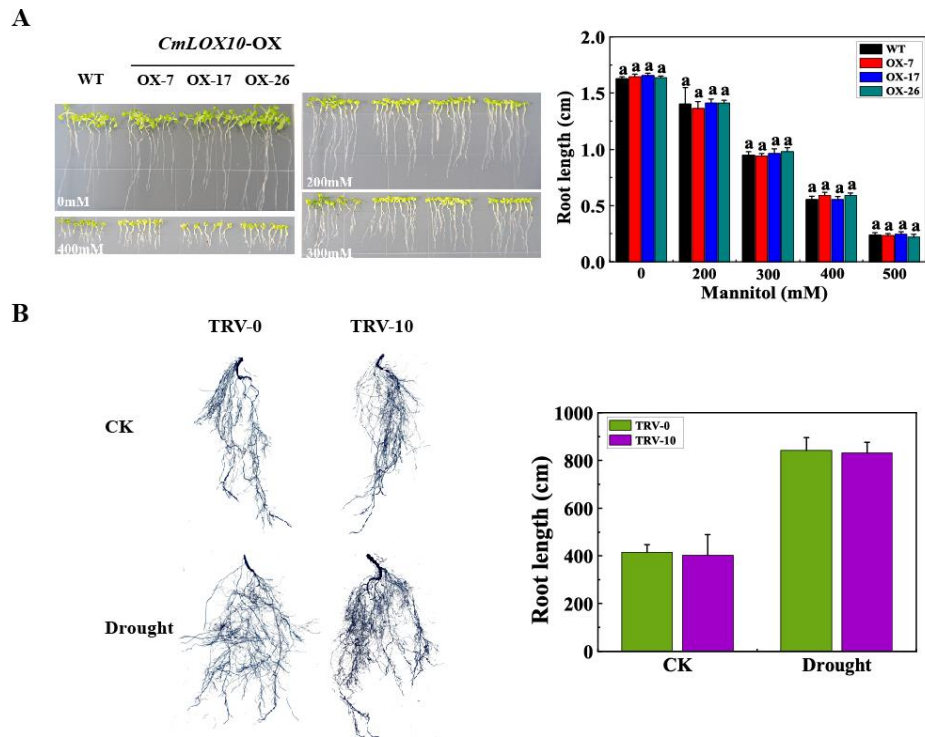

**Supplemental Fig. S1** *CmLOX10* has no effect on root length. (A) Phenotype and root length of *CmLOX10*-overexpressed plants in the presence of different concentrations of mannitol. (B) Phenotype and root length of *CmLOX10*-silenced and control plants under normal and drought conditions. Error bars indicate SD for three measurements. Different letters indicate significant differences at  $P < 0.05$  (Duncan's multiple range test) of levels for the same index in WT, OX-7, OX-17 and OX-26 plants.

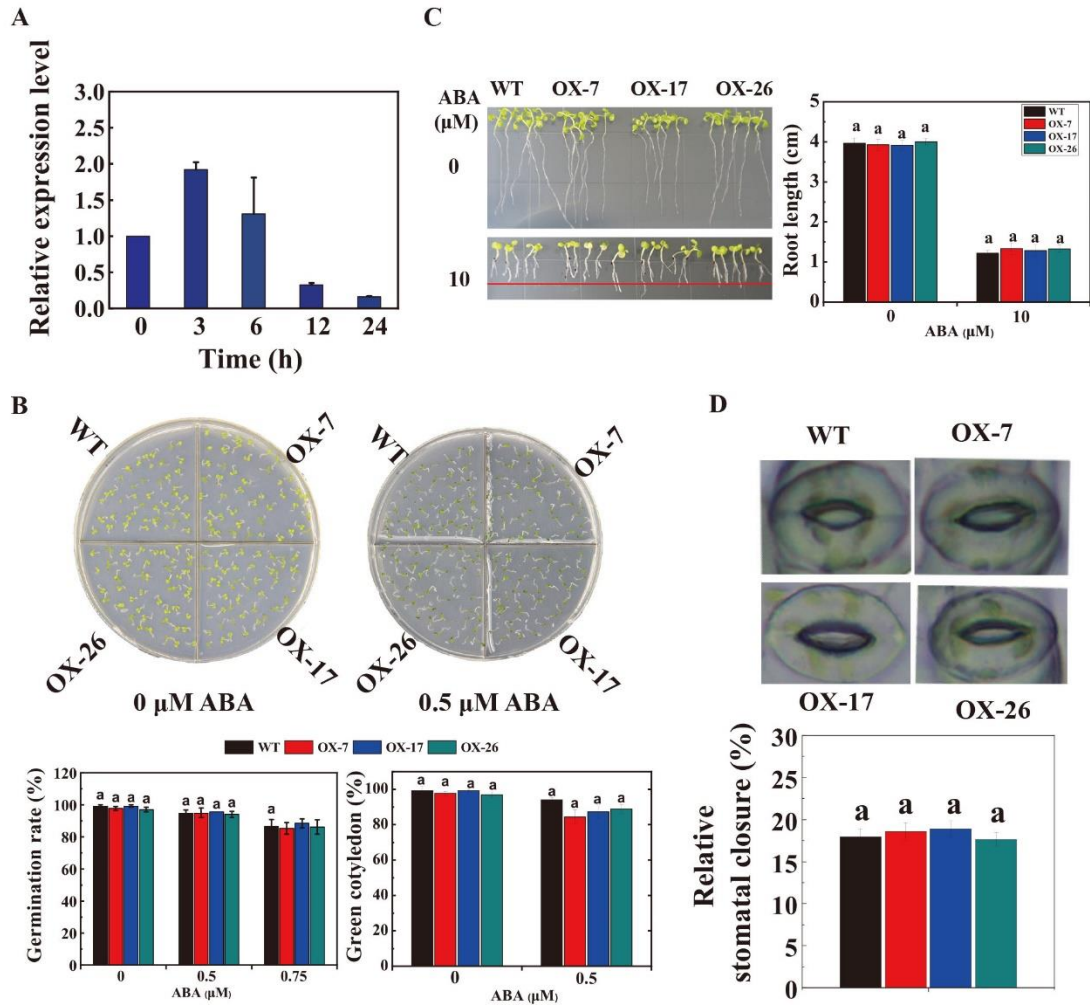

**Supplemental Fig. S2** *CmLOX10* does not respond to ABA signals. **(A)** The “four leaves stage” oriental melon leaves were treated with 100  $\mu$ M ABA then expression of the *CmLOX10* gene was measured. The experiment including three biological repeats, and four plants were used at one biological repeat **(B)** Phenotype, germination rate and green cotyledon and **(C)** Root length of WT and *CmLOX10*-OX plants under ABA treatment. **(D)** Relative stomatal closure indicates the percentage of reduction of stomatal aperture after ABA (10  $\mu$ M) treatment compared with non-treated leaf. Error bars indicate SD for three measurements. Different letters indicate significant differences at  $P < 0.05$  (Duncan’s multiple range test) of levels for the same index in WT, OX-7, OX-17 and OX-26 plants.
